# Supplementary material for: The elusive power of the individual victim: Failure to find a difference in the effectiveness of charitable appeals focused on one compared to many victims
Source: PubMed Central journal article supplement (PMC6051573; doi:10.1371/journal.pone.0199535), 2018-07-18
Supplement: pone.0199535.s010.pdf [file pone.0199535.s010.pdf]

**Supplementary Materials – S2 – Tables for Descriptive Statistics and Correlations for Studies 1 and 2**

*Table A.*

| Location = United States |            |       |             |       |              |       |                    |       |
|--------------------------|------------|-------|-------------|-------|--------------|-------|--------------------|-------|
|                          | One victim |       | Five victim |       | Many victims |       | One & Many victims |       |
|                          | Mean       | SD    | Mean        | SD    | Mean         | SD    | Mean               | SD    |
| Feelings                 | 3.40       | 0.97  | 3.20        | 1.04  | 3.49         | 0.97  | 3.47               | 0.94  |
| Negative affect          | 4.08       | 0.98  | 3.84        | 1.06  | 3.99         | 0.95  | 4.08               | 0.97  |
| Donation Willingness     | 0.75       | 0.44  | 0.58        | 0.50  | 0.77         | 0.42  | 0.70               | 0.46  |
| Donation Amount          | 14.74      | 15.43 | 11.21       | 14.39 | 13.67        | 13.79 | 13.36              | 13.12 |
| Policy Support           | 4.52       | 1.05  | 4.54        | 1.03  | 4.72         | 1.02  | 4.74               | 1.01  |
| Willingness to volunteer | 4.05       | 1.15  | 3.84        | 1.04  | 4.02         | 1.15  | 3.97               | 1.16  |

  

| Location = Kenya         |            |       |             |       |              |       |                    |       |
|--------------------------|------------|-------|-------------|-------|--------------|-------|--------------------|-------|
|                          | One victim |       | Five victim |       | Many victims |       | One & Many victims |       |
|                          | Mean       | SD    | Mean        | SD    | Mean         | SD    | Mean               | SD    |
| Feelings                 | 3.24       | 0.94  | 3.15        | 0.98  | 3.21         | 0.93  | 3.13               | 1.00  |
| Negative affect          | 3.92       | 0.89  | 3.98        | 1.05  | 3.85         | 1.10  | 3.89               | 1.00  |
| Donation Willingness     | 0.71       | 0.45  | 0.66        | 0.47  | 0.69         | 0.47  | 0.61               | 0.49  |
| Donation Amount          | 12.88      | 14.52 | 12.82       | 13.15 | 13.14        | 13.43 | 10.94              | 13.63 |
| Policy Support           | 3.77       | 1.01  | 3.66        | 1.11  | 3.69         | 1.21  | 3.70               | 1.13  |
| Willingness to volunteer | 3.64       | 1.08  | 3.68        | 1.04  | 3.68         | 1.19  | 3.65               | 1.30  |

*Table B.*

|                             | 1.     | 2.     | 3.     | 4.     | 5.     | 6. |
|-----------------------------|--------|--------|--------|--------|--------|----|
| 1. Feelings                 | -      |        |        |        |        |    |
| 2. Negative affect          | .715** | -      |        |        |        |    |
| 3. Donation Willingness     | .479** | .345** | -      |        |        |    |
| 4. Donation Amount          | .442** | .302** | .628** | -      |        |    |
| 5. Policy Support           | .563** | .426** | .328** | .286** | -      |    |
| 6. Willingness to volunteer | .698** | .513** | .493** | .416** | .534** | -  |

*Note.* Coefficients are zero-order Pearson correlations.  $N = 924$ . \*\*  $p < .01$ .

Table C.

| One Victim               |                        |       |           |       |          |       |
|--------------------------|------------------------|-------|-----------|-------|----------|-------|
|                          | Individual Child Image |       | Map Image |       | No Image |       |
|                          | Mean                   | SD    | Mean      | SD    | Mean     | SD    |
| Feelings                 | 3.20                   | 0.99  | 3.26      | 0.96  | 3.14     | 1.12  |
| Negative affect          | 4.12                   | 1.15  | 4.18      | 1.00  | 4.03     | 1.22  |
| Donation Willingness     | 0.41                   | 0.49  | 0.41      | 0.49  | 0.43     | 0.50  |
| Donation Amount          | 6.59                   | 11.73 | 7.85      | 13.51 | 9.14     | 14.87 |
| Policy Support           | 3.96                   | 1.50  | 3.95      | 1.53  | 3.89     | 1.60  |
| Willingness to volunteer | 3.36                   | 1.45  | 3.55      | 1.39  | 3.40     | 1.52  |
| Many Victims             |                        |       |           |       |          |       |
|                          | Individual Child Image |       | Map Image |       | No Image |       |
|                          | Mean                   | SD    | Mean      | SD    | Mean     | SD    |
| Feelings                 | 3.27                   | 0.94  | 3.05      | 1.09  | 3.23     | 1.08  |
| Negative affect          | 4.13                   | 1.03  | 3.92      | 1.13  | 4.04     | 1.13  |
| Donation Willingness     | 0.43                   | 0.50  | 0.41      | 0.49  | 0.47     | 0.50  |
| Donation Amount          | 8.19                   | 14.13 | 7.37      | 14.11 | 8.15     | 13.72 |
| Policy Support           | 3.92                   | 1.46  | 3.63      | 1.60  | 3.89     | 1.59  |
| Willingness to volunteer | 3.50                   | 1.36  | 3.23      | 1.39  | 3.36     | 1.42  |

Table D.

|                             | 1.     | 2.     | 3.     | 4.     | 5.     | 6. |
|-----------------------------|--------|--------|--------|--------|--------|----|
| 1. Feelings                 | -      |        |        |        |        |    |
| 2. Negative affect          | .730** | -      |        |        |        |    |
| 3. Donation Willingness     | .617** | .418** | -      |        |        |    |
| 4. Donation Amount          | .496** | .320** | .666** | -      |        |    |
| 5. Policy Support           | .628** | .519** | .473** | .408** | -      |    |
| 6. Willingness to volunteer | .710** | .556** | .604** | .525** | .681** | -  |

Note. Coefficients are zero-order Pearson correlations.  $N = 1085$ . \*\*  $p < .01$ .
